# Supplementary material for: Two isoforms of aquaporin 2 responsive to hypertonic stress in bottlenose dolphin
Source: Oxford University Press journal article supplement (doi:10.1242/jeb.132811), 2016-01-01
Supplement: jeb132811supp.pdf [file jeb132811supp.pdf]

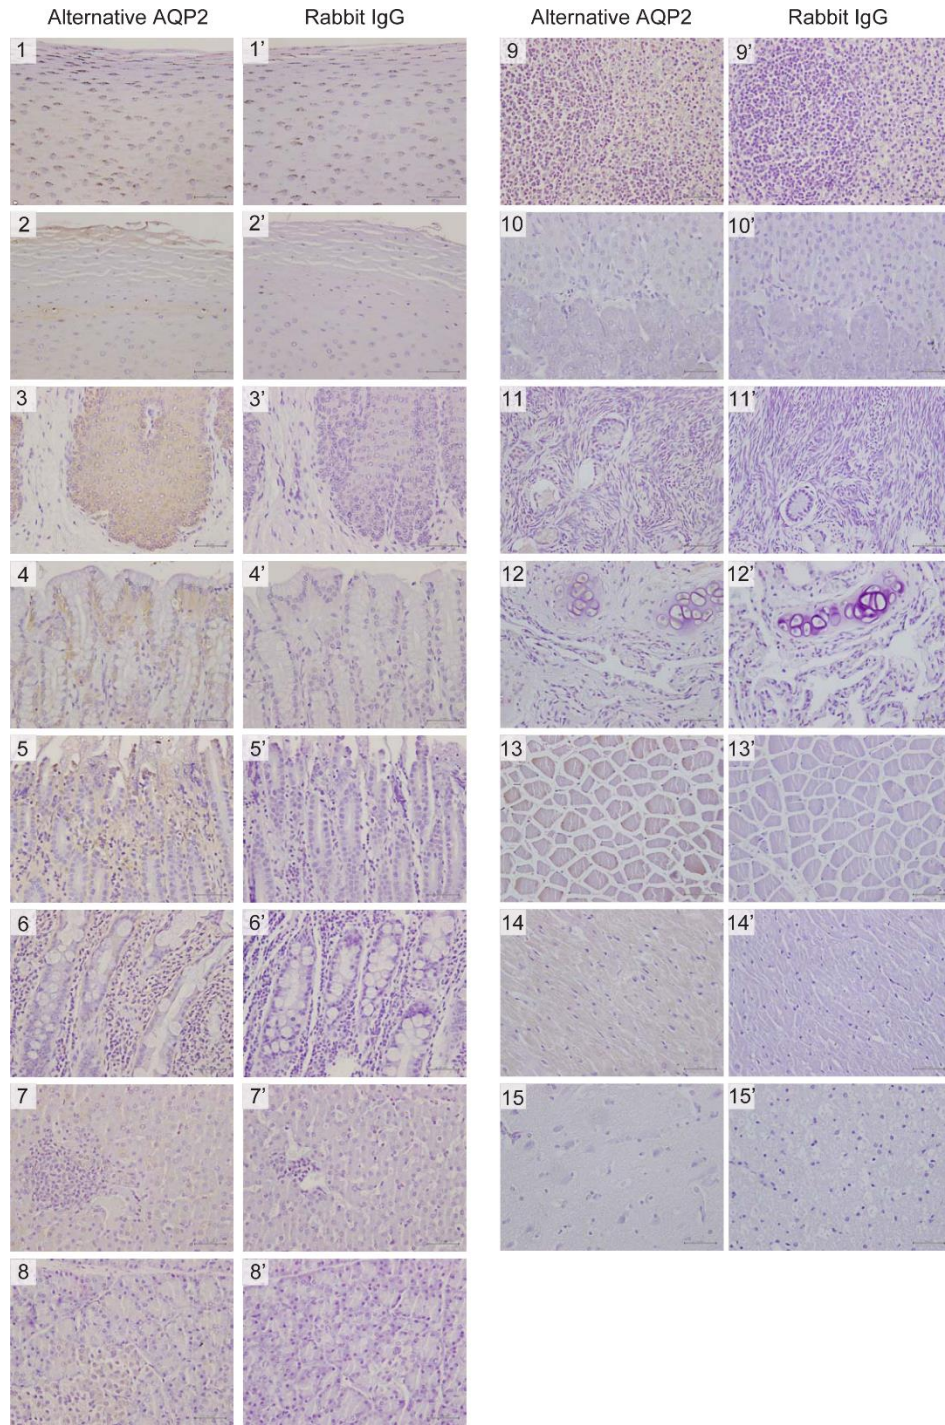

**Fig. S1:** Immunohistochemistry for alternative AQP2 in 15 organs of bottlenose dolphin. 1: epidermis, 2: esophagus, 3: forestomach, 4: main stomach, 5: pyloric stomach, 6: small intestine, 7: liver, 8: pancreas, 9: spleen, 10: adrenal gland, 11: ovary, 12: lung, 13: muscle, 14: heart, and 15: brain. Rabbit IgG was used instead of antibodies for a negative control (numbers with dash shows negative controls). Positive reaction was detected in many organs except adrenal grand and brain.

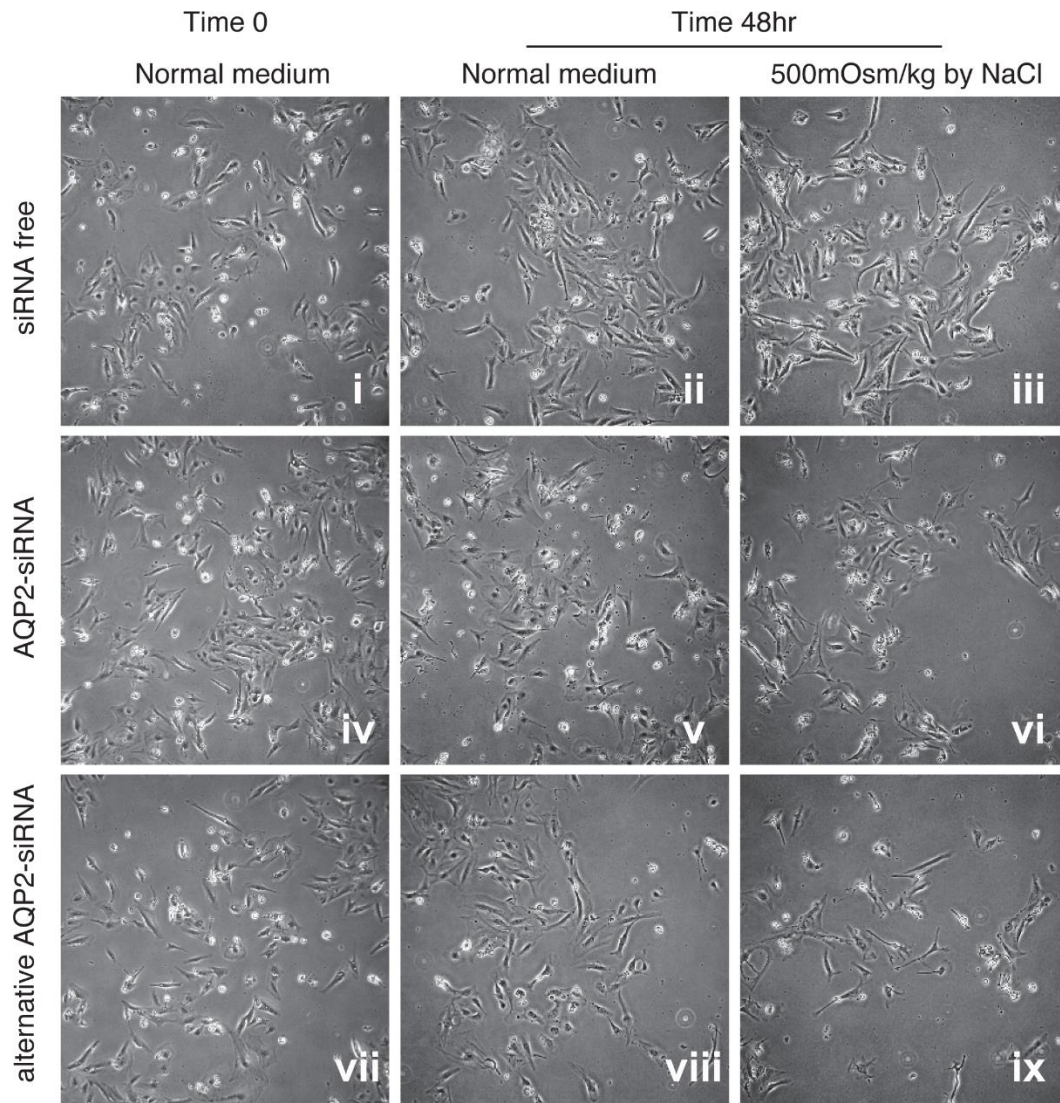

**Fig. S2.** Effect of siRNA knockdown of AQP2 and alternative AQP2 in cells exposed to hyperosmotic medium (500 mOsm/kg by addition of NaCl). Time 0 indicates the time point just before cell exposure to hyperosmotic medium (i, iv, and vii). Compared with the normal medium (255 mOsm/kg; ii, v, and viii), hyperosmolality caused severe cell shrinkage and death not in siRNA free cells but in cells transfected with AQP2 siRNA (vi) and alternative AQP2 siRNA (ix).

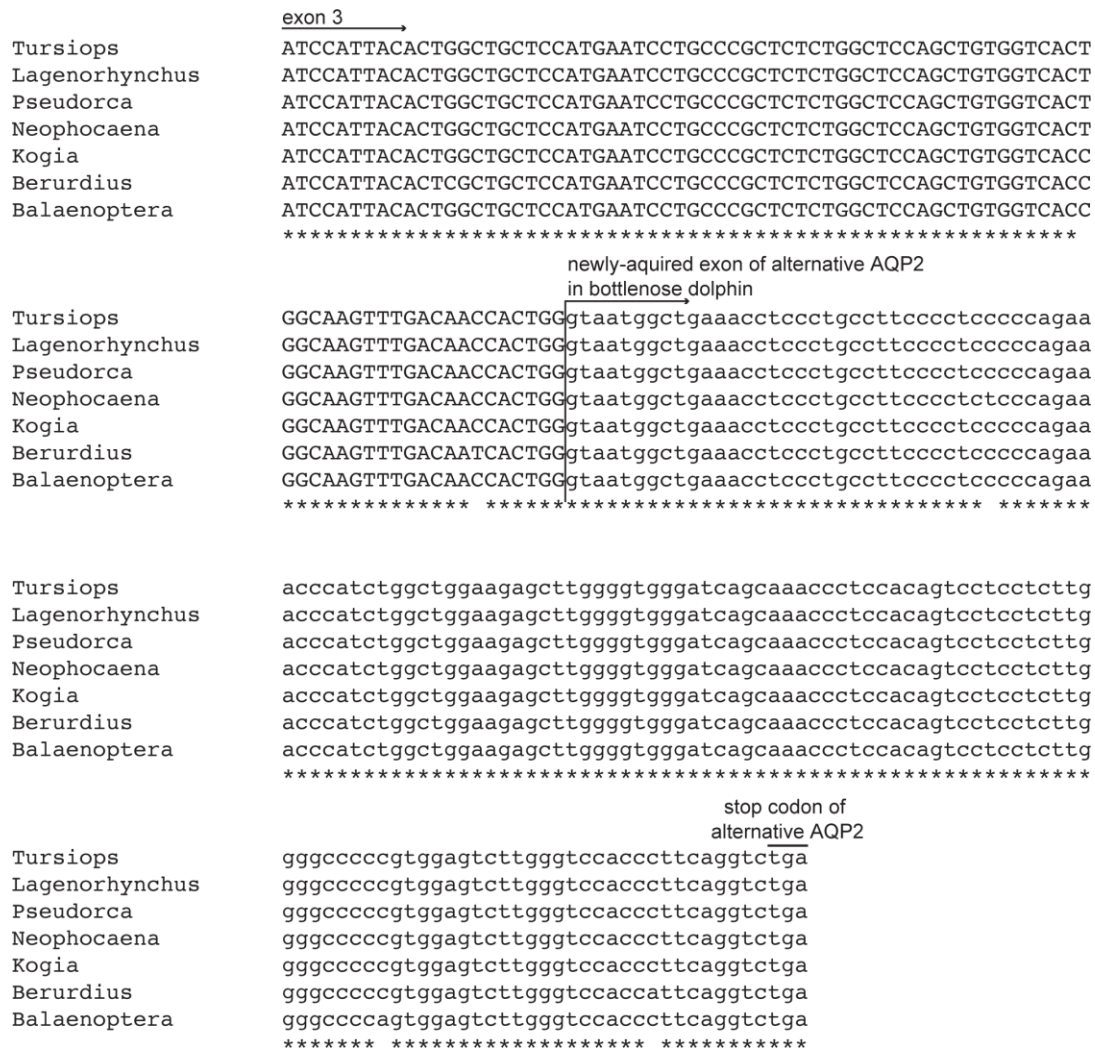

**Fig. S3.** DNA sequence alignment of the region through exon 3 to the position of the stop codon of alternative AQP2 between AQP2 gene of 7 cetacean species in 5 families. Upper case characters indicate the bases of the original exon 3 of AQP2, and lower case characters indicate the intron of conventional AQP2 that is alternatively spliced to yield an elongated exon in the bottlenose dolphin. Asterisk indicates positions that have a single, fully-conserved base.

**Table S1.** Primer sequences

| Primers                |                                      |
|------------------------|--------------------------------------|
| AQP2 FW1               | 5'-atgtgggaactccggtccatagccttctc-3'  |
| AQP2 FW2               | 5'-tgccagcatgtgggaactccggtcc-3'      |
| AQP2 FW3               | 5'-atctcctcgggatccattac-3'           |
| AQP2 RV1               | 5'-tcaggccttgctgccccgaggcaggctc-3'   |
| AQP2 RV2               | 5'-tcctcaaggcaagggatctgccac-3'       |
| AQP2 RV3               | 5'-aacaggatgtagttgtagag-3'           |
| alternative AQP2 FW    | 5'-ctagccacagaagtcttcgaagcatgtg-3'   |
| alternative AQP2 FW2   | 5'-caacaactcgacagctggccaggccg-3'     |
| alternative AQP2 RV1   | 5'-ttacgtagtataaacattgccattatcgag-3' |
| alternative AQP2 RV2   | 5'-tccaaagcaaccactgctctt-3'          |
| alternative AQP2 RV3   | 5'-ttccagccagatgggtttct-3'           |
| AQP2 GRFW              | 5'-cactgggtcttctgggtcggacccttggtc-3' |
| AQP2 GRRV              | 5'-ccttcagcacggccaggcgtccgacag-3'    |
| alternative AQP2 GRFW1 | 5'-cccagaaacctatctgggtggaagagct-3'   |
| alternative AQP2 GRFW2 | 5'-gtggaatcagcaaacctccacagtcctc-3'   |
| alternative AQP2 GRRV  | 5'-agctcttcagccagatgggtttctggg-3'    |
| GAPDH FW               | 5'-atcaccatctccaggagcg-3'            |
| GAPDH RV               | 5'-gcattgctgacgatcttgag-3'           |
| TonEBP FW1             | 5'-ctatgatcttctccaaaggagtacag-3'     |
| TonEBP FW2             | 5'-tgtacaacctgagaccagcaca-3'         |
| TonEBP RV1             | 5'-cagtaaaaggagccagttaagttgtc-3'     |
| TonEBP RV2             | 5'-tgctcggatcaaggccaactc-3'          |
| 5' primer              | 5'-cgactggagcacgaggacactga-3'        |
| 3' primer              | 5'-gctgtcaacgatacgtacgtaacg-3'       |

**Table S2.** siRNA sequences

| siRNA                                  |                             |
|----------------------------------------|-----------------------------|
| d-AQP2 siRNA (1) sense                 | 5'-cccuccucuacaacuacautt-3' |
| d-AQP2 siRNA (1) antisense             | 5'-augaguuguagaggagggtt-3'  |
| d-AQP2 siRNA (2) sense                 | 5'-gaauggggcaucagguuuutt-3' |
| d-AQP2 siRNA (2) antisense             | 5'-aaaaccugaugcccauuctt-3'  |
| d-AQP2 siRNA (3) sense                 | 5'-caauggcuggccccuuuutt-3'  |
| d-AQP2 siRNA (3) antisense             | 5'-aaaagggggccagccauugt-3'  |
| d-alternative AQP2 siRNA (1) sense     | 5'-cacuggguaauggcugaaatt-3' |
| d-alternative AQP2 siRNA (1) antisense | 5'-uuucagccauuaccagugt-3'   |
| d-alternative AQP2 siRNA (2) sense     | 5'-caucuggcuggaagagcuutt-3' |
| d-alternative AQP2 siRNA (2) antisense | 5'-aagcucuuccagccagaugt-3'  |
| d-alternative AQP2 siRNA (3) sense     | 5'-gugguugcuuuggcuuuuutt-3' |
| d-alternative AQP2 siRNA (3) antisense | 5'-aaaagccaaagcaaccactt-3'  |
| d-GAPDH siRNA (1) sense                | 5'-gaacggauuuggccguauutt-3' |
| d-GAPDH siRNA (1) antisense            | 5'-aaucggcctaaauccguuctt-3' |
| d-GAPDH siRNA (2) sense                | 5'-caccacggcaaguuccautt-3'  |
| d-GAPDH siRNA (2) antisense            | 5'-auggaacuugccgugggugt-3'  |
| d-GAPDH siRNA (3) sense                | 5'-gccuccugcaccaccaacutt-3' |
| d-GAPDH siRNA (3) antisense            | 5'-aguugguggucaggaggctt-3'  |
